# Supplementary material
Source: PubMed Central journal article supplement (PMC3285338)
Supplement: supp_M111.264473_jbc.M111.264473-1.pdf [file supp_M111.264473_jbc.M111.264473-1.pdf]

## SUPPLEMENTAL DATA

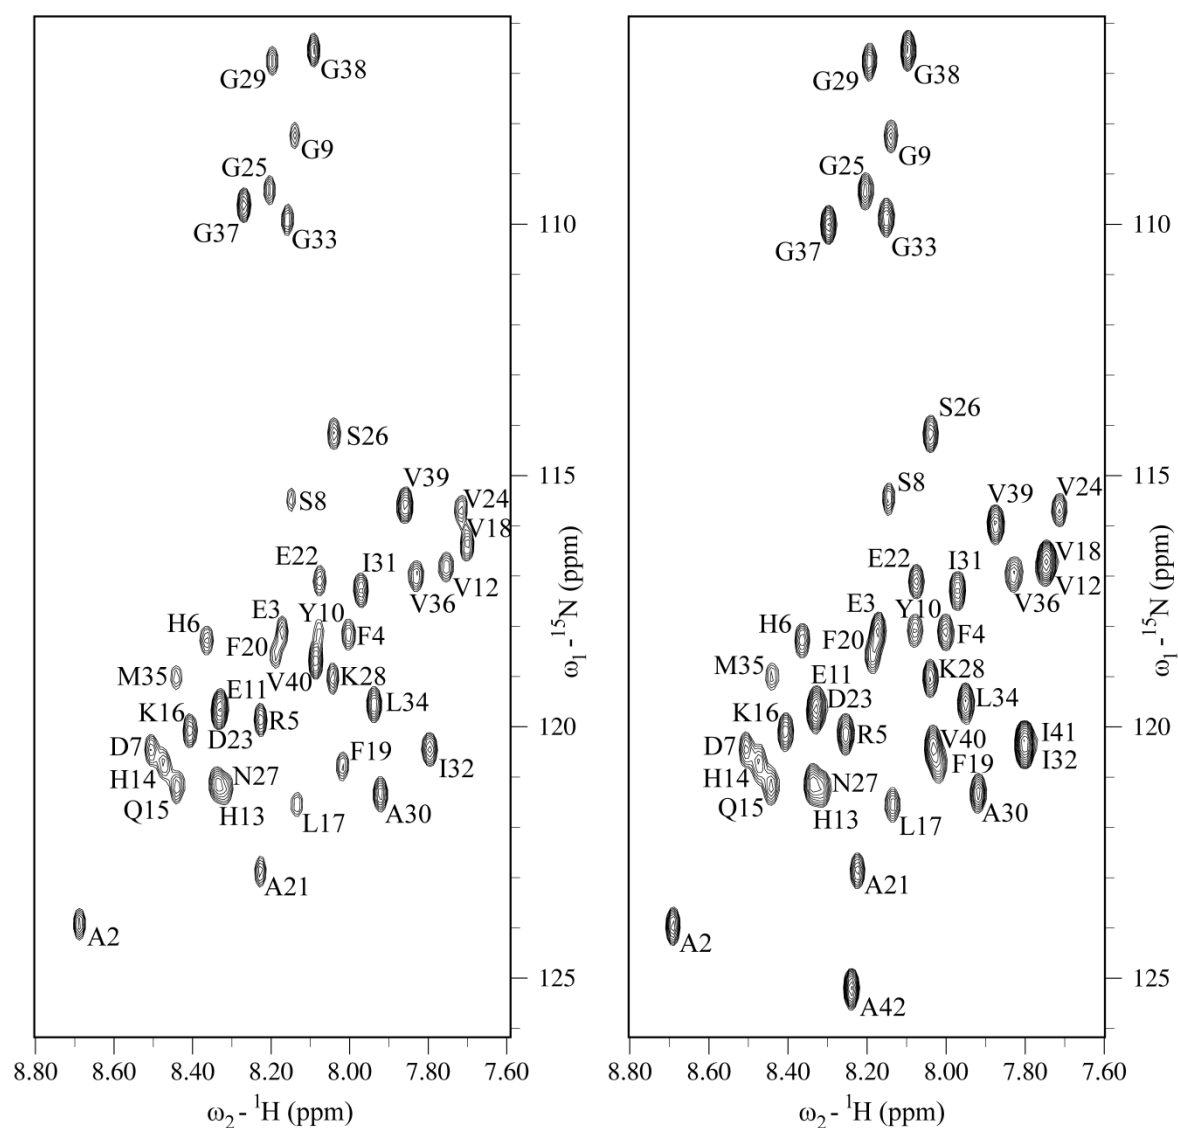

**Supplemental Fig. S1.** HSQC spectra obtained after redissolving A $\beta$  fibrils in perdeuterated dimethylsulfoxide containing 0.01% deuterated trifluoroacetic acid. *A.* HSQC spectrum of  $^{15}\text{N}$ -labeled monomeric A $\beta_{40}$  obtained from resolubilized fully protonated amyloid fibrils. The cross-peaks of residues 11/23 and 13/27 overlap in the A $\beta_{40}$  spectrum. *B.* HSQC spectrum of  $^{15}\text{N}$ -labeled monomeric A $\beta_{42}$  obtained from fully protonated fibrils. For A $\beta_{42}$ , there are (partial) overlaps in the cross-peaks of residues 11/23, 12/18, 13/27, 19/40 and 32/41. The sequence-specific assignment of the peptide backbone amides is indicated next to each cross-peak. The presence of the unlabeled A $\beta$  alloform in the mixtures does not influence the spectra as expected for monomeric peptides, since the cross-peaks of labeled peptides in the 1:9 and 3:7 ratios display identical chemical shifts. For the HDX interpretation, the intensities of the peaks are determined by the height of the spectral signals.

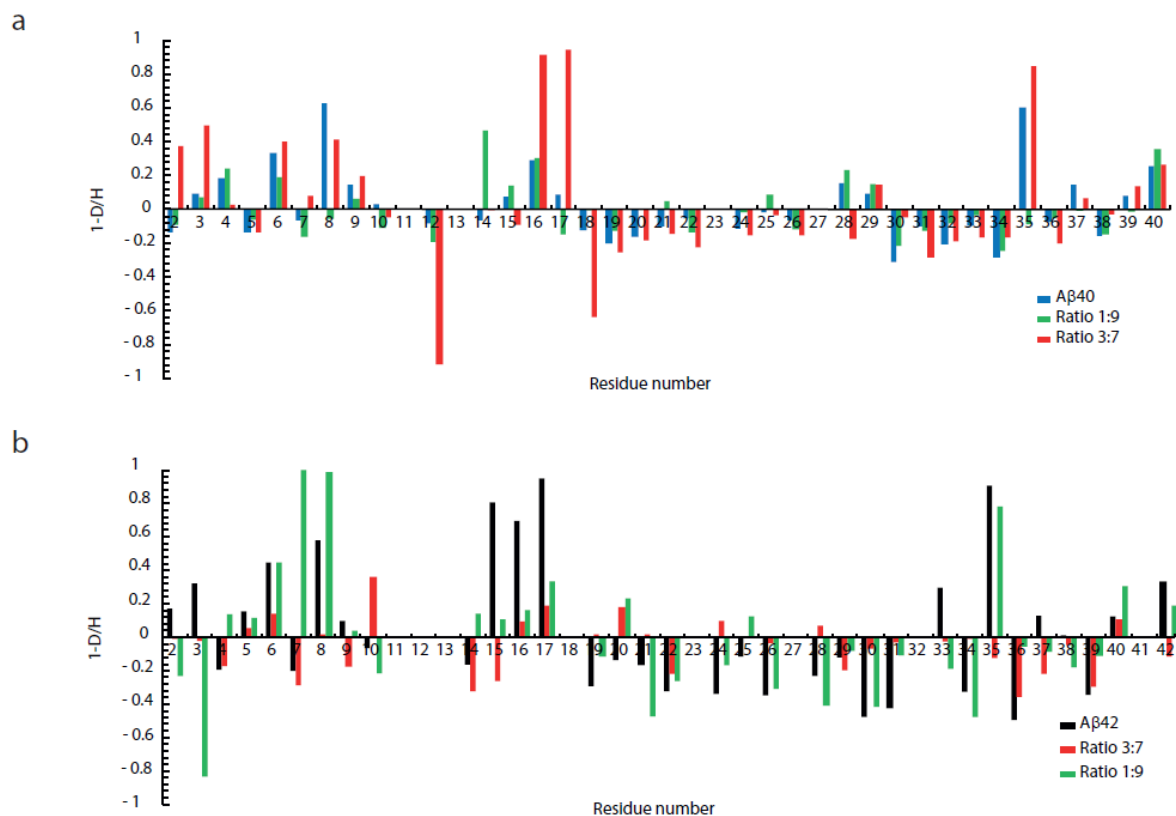

**Supplemental Fig. S2.** Atomic resolution HDX using NMR reveals that small differences at atomic level may be present between fibrillar  $\text{A}\beta$  ratios. The protection factor of each residue is derived from comparing the corresponding peak intensities observed under fully protonated conditions to the signal intensities after exchange with  $\text{D}_2\text{O}$ . The results are shown as bar plots. In these plots no data is available for residues 11, 12, 13, 18, 19, 23, 27, 32, 40 and 41 for  $\text{A}\beta_{42}$ , and 11, 13, 23 and 27 for  $\text{A}\beta_{40}$  due to (partial) overlapping peaks (and therefore ambiguous N-H cross-peak assignments). A) signals for the  $^{15}\text{N}$ -labeled  $\text{A}\beta_{40}$  alloform in the ratios; B) signals for the  $^{15}\text{N}$ -labeled  $\text{A}\beta_{42}$  alloform.

Supplementary Table 1. A $\beta$  oligomer population patterns as derived from mass spectrometry analysis. Three different incubation times were analyzed for each ratio and the detected molecular assemblies (kDa) are reported in the tables.

| # A $\beta$              | Pure A $\beta_{40}$ |       |        | Ratio 1:9 |       |       | Ratio 3:7 |       |       | Pure A $\beta_{42}$ |       |       |
|--------------------------|---------------------|-------|--------|-----------|-------|-------|-----------|-------|-------|---------------------|-------|-------|
|                          | 1h                  | 3h    | 6h     | 1h        | 3h    | 6h    | 1h        | 3h    | 6h    | 1h                  | 3h    | 6h    |
| 1                        | 4.36                | 4.32  | 4.35   | 4.43      | 4.44  | 4.46  | 4.46      | 4.47  | 4.46  | 4.45                | 4.45  | 4.46  |
| 2                        | 8.73                | 8.75  | 8.72   | 8.90      | 8.94  | 8.91  | 8.96      | 8.92  | 8.95  | 8.94                | 8.92  | 8.98  |
| 3                        | 13.07               | 13.06 | 13.08  | 13.28     | 13.53 | 13.57 | 13.57     | 13.58 | 13.56 | 13.37               | 13.39 | 13.55 |
| 4                        | 17.42               | 17.43 | 17.41  | 17.72     | 18.08 | 18.10 | 18.10     | 18.09 | 18.08 | 17.79               | 17.77 | 17.70 |
| 5                        | 21.83               | 21.83 | 21.84  |           | 22.68 | 22.67 | 22.67     | 22.67 | 22.67 | 22.24               | 22.22 | 22.26 |
| 6                        | 26.28               | 26.29 | 26.29  |           | 27.13 | 27.12 | 27.12     | 27.12 | 27.13 | 26.69               | 26.67 | 26.65 |
| 7                        | 30.57               | 30.56 | 30.58  |           | 31.58 |       |           | 31.17 | 31.17 | 31.21               | 31.22 | 31.20 |
| 8                        | 34.91               | 34.91 | 34.92  |           | 36.02 |       |           | 35.57 | 35.57 | 35.99               | 35.98 | 35.95 |
| 9                        | 39.29               | 39.30 | 39.30  |           |       |       |           | 40.02 | 40.05 | 40.45               | 40.49 | 40.45 |
| 10                       | 43.69               | 43.68 | 43.70  |           |       |       |           | 44.49 |       | 44.92               | 44.89 | 44.88 |
| 11                       | 47.91               | 47.92 | 47.92  |           |       |       |           | 48.99 |       | 49.36               | 49.31 | 49.29 |
| 12                       | 52.23               | 52.24 | 52.24  |           |       |       |           | 53.61 |       | 53.73               | 53.76 |       |
| 13                       | 56.64               | 56.57 | 56.66  |           |       |       |           | 58.13 |       | 58.20               | 58.18 |       |
| 14                       |                     | 60.91 | 61.01  |           |       |       |           | 62.72 |       |                     | 62.63 |       |
| 15                       |                     | 65.25 | 65.30  |           |       |       |           | 66.70 |       |                     | 65.32 |       |
| 16                       |                     | 69.65 | 69.61  |           |       |       |           |       |       |                     |       |       |
| 17                       |                     | 73.92 | 73.98  |           |       |       |           |       |       |                     |       |       |
| 18                       |                     |       | 78.33  |           |       |       |           |       |       |                     |       |       |
| 19                       |                     |       | 82.67  |           |       |       |           |       |       |                     |       |       |
| 20                       |                     |       | 87.03  |           |       |       |           |       |       |                     |       |       |
| 21                       |                     |       | 91.39  |           |       |       |           |       |       |                     |       |       |
| 22                       |                     |       | 95.77  |           |       |       |           |       |       |                     |       |       |
| 23                       |                     |       | 99.97  |           |       |       |           |       |       |                     |       |       |
| 24                       |                     |       | 104.32 |           |       |       |           |       |       |                     |       |       |
| 25                       |                     |       | 108.67 |           |       |       |           |       |       |                     |       |       |
| <b>Higher Mass Range</b> |                     |       |        |           |       |       |           |       |       |                     |       |       |
|                          |                     | 156   | 186    |           |       | 172   |           | 156   |       | 156                 | 187   |       |
|                          |                     |       | 348    |           |       | 355   |           | 315   |       | 253                 |       |       |
|                          |                     |       | 714    |           |       | 515   |           | 471   |       |                     |       |       |
|                          |                     |       | 852    |           |       |       |           | 626   |       |                     |       |       |
